# Supplementary material for: Psychosocial Wellbeing among Patients with Breast Cancer during COVID-19
Source: MDPI journal article supplement (doi:10.3390/curroncol30040294), 2023-03-30
Supplement: s1 [file s1]

SUPPLEMENTAL FILE

Table S1. Intercorrelations Among Psychosocial Wellbeing Measures.

| N=669             |                  |                             | Correlations               |                        |            |               |                     |                |                            |                             |                         |                          |            |            |                       |                        |                       |                    |   |
|-------------------|------------------|-----------------------------|----------------------------|------------------------|------------|---------------|---------------------|----------------|----------------------------|-----------------------------|-------------------------|--------------------------|------------|------------|-----------------------|------------------------|-----------------------|--------------------|---|
|                   |                  |                             | PHQ-8<br>Score             | COST<br>Total<br>Score | CSS Scores |               |                     |                | FACT-B Scores              |                             |                         |                          |            | PIC Score  |                       |                        |                       |                    |   |
|                   |                  |                             |                            |                        | Danger     | Socioeconomic | Traumatic<br>Stress | BC<br>Subscale | Physical<br>Well-<br>Being | Social/Family<br>Well-Being | Emotional<br>Well-Being | Functional<br>Well-Being | FACT-<br>G | FACT-<br>B | Cognitive<br>Distress | Cognitive<br>Avoidance | Emotional<br>Distress | Fighting<br>Spirit |   |
| Spearman's<br>rho | PHQ-8 Score      | Correlation<br>Coefficient  | —                          |                        |            |               |                     |                |                            |                             |                         |                          |            |            |                       |                        |                       |                    |   |
|                   | COST Total Score | Correlation<br>Coefficient  | -0.465†                    | —                      |            |               |                     |                |                            |                             |                         |                          |            |            |                       |                        |                       |                    |   |
|                   | CSS Scores       | Danger                      | Correlation<br>Coefficient | 0.297†                 | -0.242†    | —             |                     |                |                            |                             |                         |                          |            |            |                       |                        |                       |                    |   |
|                   |                  | Socioeconomic               | Correlation<br>Coefficient | 0.273†                 | -0.299†    | 0.512†        | —                   |                |                            |                             |                         |                          |            |            |                       |                        |                       |                    |   |
|                   |                  | Traumatic<br>Stress         | Correlation<br>Coefficient | 0.385†                 | -0.281†    | 0.670†        | 0.493†              |                |                            |                             |                         |                          |            |            |                       |                        |                       |                    |   |
|                   |                  | BC Subscale                 | Correlation<br>Coefficient | -0.588†                | 0.452†     | -0.314†       | -0.345†             | -0.355†        | —                          |                             |                         |                          |            |            |                       |                        |                       |                    |   |
|                   | FACT-B Scores    | Physical Well-<br>Being     | Correlation<br>Coefficient | -0.625†                | 0.491†     | -0.290†       | -0.291†             | -0.332†        | 0.584†                     | —                           |                         |                          |            |            |                       |                        |                       |                    |   |
|                   |                  | Social/Family<br>Well-Being | Correlation<br>Coefficient | -0.403†                | 0.322†     | -0.224†       | -0.199†             | -0.231†        | 0.307†                     | 0.309†                      | —                       |                          |            |            |                       |                        |                       |                    |   |
|                   |                  | Emotional<br>Well-Being     | Correlation<br>Coefficient | -0.578†                | 0.392†     | -0.376†       | -0.274†             | -0.387†        | 0.493†                     | 0.482†                      | 0.342†                  | —                        |            |            |                       |                        |                       |                    |   |
|                   |                  | Functional<br>Well-Being    | Correlation<br>Coefficient | -0.644†                | 0.420†     | -0.278†       | -0.266†             | -0.333†        | 0.435†                     | 0.574†                      | 0.552†                  | 0.504†                   | —          |            |                       |                        |                       |                    |   |
|                   |                  | FACT-G                      | Correlation<br>Coefficient | -0.723†                | 0.529†     | -0.370†       | -0.330†             | -0.407†        | 0.585†                     | 0.779†                      | 0.708†                  | 0.719†                   | 0.852†     | —          |                       |                        |                       |                    |   |
|                   |                  | FACT-B                      | Correlation<br>Coefficient | -0.752†                | 0.553†     | -0.391†       | -0.363†             | -0.428†        | 0.759†                     | 0.796†                      | 0.653†                  | 0.716†                   | 0.803†     | 0.969†     | —                     |                        |                       |                    |   |
|                   | PIC Scores       | Cognitive<br>Distress       | Correlation<br>Coefficient | 0.382†                 | -0.289†    | 0.289†        | 0.286†              | 0.289†         | -0.359†                    | -0.326†                     | -0.321†                 | -0.574†                  | -0.368†    | -0.490†    | -0.495†               | —                      |                       |                    |   |
|                   |                  | Cognitive<br>Avoidance      | Correlation<br>Coefficient | 0.095*                 | -0.090*    | 0.093*        | 0.199†              | 0.123**        | -0.101**                   | -0.076*                     | -0.059                  | -0.122**                 | -0.089*    | —          | 0.117**               | 0.125**                | 0.235†                | —                  |   |
|                   |                  | Emotional<br>Distress       | Correlation<br>Coefficient | 0.385†                 | -0.230†    | 0.321†        | 0.198†              | 0.328†         | -0.340†                    | -0.314†                     | -0.159†                 | -0.685†                  | -0.304†    | -0.441†    | -0.451†               | 0.510†                 | 0.174†                | —                  |   |
|                   |                  | Fighting Spirit             | Correlation<br>Coefficient | 0.069                  | -0.129**   | 0.133**       | 0.163†              | 0.137†         | -0.140†                    | -0.131**                    | 0.080*                  | -0.108**                 | -0.018     | -0.062     | -0.094*               | 0.083*                 | 0.125**               | 0.304†             | — |

BC, breast cancer; COST, Comprehensive Score for Financial Toxicity; CSS, COVID Stress Scale; FACT, Functional Assessment of Cancer Therapy; FACT-B, Functional Assessment of Cancer Therapy – Breast; FACT-G, FACT, Functional Assessment of Cancer Therapy – General; PIC, Psychological Impact of Cancer; PHQ-8, 8-Item Patient Health Questionnaire.  
\*p<0.05; \*\*p<0.01; †p<0.001.
